# Supplementary material for: Media Screening for Obtaining Haematococcus pluvialis Red Motile Macrozooids Rich in Astaxanthin and Fatty Acids
Source: PubMed Central journal article supplement (PMC5872028; doi:10.3390/biology7010002), 2017-12-26
Supplement: biology-07-00002-s001.pdf [file biology-07-00002-s001.pdf]

# Media screening for obtaining *Haematococcus pluvialis* red motile macrozooids rich in astaxanthin and fatty acids

Thomas O. Butler, Gordon J. McDougall, Raymond Campbell, Michele S. Stanley, and John G Day

## Supplementary information

Table S1 Sources of astaxanthin from natural origins

| Species                                                                    | Class               | Astaxanthin content (% DW) | Reference |
|----------------------------------------------------------------------------|---------------------|----------------------------|-----------|
| <i>Haematococcus pluvialis</i>                                             | Chlorophyceae       | 4.0                        | [2]       |
| <i>Chlorella zofingiensis</i>                                              | Chlorophyceae       | 0.7                        | [77]      |
| <i>Scenedesmus vacuolatus</i>                                              | Chlorophyceae       | 0.3                        | [77]      |
| <i>Scotiellopsis oocystiformis</i>                                         | Chlorophyceae       | 1.1                        | [77]      |
| <i>Neochloris wimmeri</i>                                                  | Chlorophyceae       | 1.9                        | [77]      |
| <i>Protosiphon botryoides</i>                                              | Chlorophyceae       | 1.4                        | [77]      |
| <i>Chlorococcum sp.</i>                                                    | Chlorophyceae       | 0.2                        | [78]      |
| <i>Adonis annua</i>                                                        | Dicotyledons        | 1                          | [79]      |
| <i>Ulva intestinalis</i>                                                   | Ulvophyceae         | 0.02                       | [80]      |
| <i>Ulva lactuca</i>                                                        | Ulvophyceae         | 0.01                       | [80]      |
| <i>Catenella repens</i>                                                    | Florideophyceae     | 0.02                       | [80]      |
| <i>Agrobacterium aurantiacum</i>                                           | Alphaproteobacteria | 0.01                       | [81]      |
| <i>Paracoccus carotinifaciens</i>                                          | Alphaproteobacteria | 2.2                        | [82]      |
| <i>Phaffia rhodozyma</i><br><i>Xanthophyllomyces</i><br><i>dendrorhous</i> | Tremellomycetes     | 0.01                       | [83]      |

**Table S2** *H. pluvialis* biomass and astaxanthin productivity

| Strain no.                     | Conditions                                                                                                                         | Culture time (days) | Biomass yields green stage (g L <sup>-1</sup> DW) | Biomass productivity green stage (g L <sup>-1</sup> d <sup>-1</sup> DW) | Astaxanthin content red stage (mg g <sup>-1</sup> DW) | Astaxanthin yield red stage (mg L <sup>-1</sup> DW) | Astaxanthin productivity green + red stages (mg L <sup>-1</sup> d <sup>-1</sup> DW) | Ref. |
|--------------------------------|------------------------------------------------------------------------------------------------------------------------------------|---------------------|---------------------------------------------------|-------------------------------------------------------------------------|-------------------------------------------------------|-----------------------------------------------------|-------------------------------------------------------------------------------------|------|
| CCAP 34/7                      | 30 L air-lift bioreactor (autotrophic)                                                                                             | 90                  | 1.6                                               | 0.02                                                                    | 27                                                    | 43.2                                                | 0.5                                                                                 | [27] |
| UTEX 16                        | 3.7 L Fed-batch bioreactor (mixotrophic)                                                                                           |                     | 2.74                                              | 0.14                                                                    | 43                                                    | 64.4                                                | 3.2                                                                                 | [84] |
| NIES-144                       | 2.3 L Maxblend fermentor. pH stat fed-batch (sequential heterotrophic-autotrophic)                                                 | 30 (20+10)          | 7                                                 | 0.35                                                                    | 98                                                    | 114                                                 | 3.8                                                                                 | [85] |
| CCAP 34/8                      | 50 L tubular bioreactor, 0.6 mM nitrate for red stage, continuous one-stage production process outdoors (autotrophic)              |                     | 0.7                                               | 0.6-0.7                                                                 | 6-13                                                  | 11                                                  | 3.5-8                                                                               | [56] |
| Unknown strain from Aquasearch | Green stage in Aquasearch growth modules (AGMs), followed by open pond astaxanthin induction (autotrophic)                         | 19 (14+5)           | 0.2-0.36                                          | 0.036-0.052                                                             | 28-30                                                 |                                                     | 2.2                                                                                 | [22] |
| CCAP 34/8                      | 2 L jacketed bubble column bioreactor, 2.7 mM nitrate deprivation in red stage, one-stage continuous process indoors (autotrophic) |                     | 1.03                                              | 0.93                                                                    | 6                                                     | 6.2                                                 | 5.6                                                                                 | [43] |
| NIES-144                       | Astaxanthin induction using nitrate depletion, with 5 % CO <sub>2</sub> (autotrophic)                                              | 28                  | 2.27                                              | 0.08                                                                    | 77.2                                                  | 175.7                                               | 6.3                                                                                 | [86] |

| Strain no.   | Conditions                                                                                                                                                                     | Culture time (days)      | Biomass yields green stage (g L <sup>-1</sup> DW)   | Biomass productivity green stage (g L <sup>-1</sup> d <sup>-1</sup> DW) | Astaxanthin content red stage (mg g <sup>-1</sup> DW) | Astaxanthin yield red stage (mg L <sup>-1</sup> DW) | Astaxanthin productivity green + red stages (mg L <sup>-1</sup> d <sup>-1</sup> DW) | Ref.  |
|--------------|--------------------------------------------------------------------------------------------------------------------------------------------------------------------------------|--------------------------|-----------------------------------------------------|-------------------------------------------------------------------------|-------------------------------------------------------|-----------------------------------------------------|-------------------------------------------------------------------------------------|-------|
| CCAP 34/8    | 2L jacketed bubble column bioreactors, one-stage continuous process indoors (autotrophic)                                                                                      |                          |                                                     | 1.9                                                                     | 11                                                    |                                                     | 20.8                                                                                | [42]* |
| CCAP 34/8    | 55 L tubular bioreactor, nitrate reduced to < 5 mM for astaxanthin accumulation (autotrophic)                                                                                  | 16                       | 7                                                   | 0.55                                                                    | 20                                                    | 72                                                  | 4.5                                                                                 | [87]  |
| SAG 34/1b    | 1 L cylindrical air-lift double-region bioreactor modified into cone shape (inner core green stage, outer core red stage), batch production (autotrophic)                      | 22 (12+10)               | 4 (inner core) and 7 (outer core) after day 12 FW** | 0.33 FW                                                                 | 49.5                                                  | 357                                                 | 16.2                                                                                | [58]  |
| SCCAP k-0084 | 500 mL glass columns, two-stage strategy indoors<br><br>500 L flat vertical plate bioreactor (green stage), 2000 L tubular bioreactor (red stage), two stage strategy outdoors | 10 (4+6)<br><br>10 (4+6) | 2<br><br>1.48                                       | 0.5<br><br>0.37                                                         | 40<br><br>40                                          | 115<br><br>101                                      | 11.5<br><br>10.1                                                                    | [2]   |
| NIES-144     | Bubble column fed-batch process (autotrophic)                                                                                                                                  | 55 (12.5+42.5)           | 6.7                                                 | 0.2                                                                     | 36                                                    | 390                                                 | 7.2                                                                                 | [88]  |
| NIES-144     | 1 L flat panel bioreactor with stepwise increase in irradiance, astaxanthin induction using 5 % CO <sub>2</sub> and high light (autotrophic)                                   | 13.5 (4.5+9)             | 1.47                                                | 0.33                                                                    | 47                                                    | 190                                                 | 14.1                                                                                | [89]  |

| Strain no.  | Conditions                                                                                            | Culture time (days) | Biomass yields green stage (g L <sup>-1</sup> DW) | Biomass productivity green stage (g L <sup>-1</sup> d <sup>-1</sup> DW) | Astaxanthin content red stage (mg g <sup>-1</sup> DW) | Astaxanthin yield red stage (mg L <sup>-1</sup> DW) | Astaxanthin productivity green + red stages (mg L <sup>-1</sup> d <sup>-1</sup> DW) | Ref. |
|-------------|-------------------------------------------------------------------------------------------------------|---------------------|---------------------------------------------------|-------------------------------------------------------------------------|-------------------------------------------------------|-----------------------------------------------------|-------------------------------------------------------------------------------------|------|
| WBG 26      | Double-layer circular pond, two-step one-stage process (autotrophic)                                  | 12                  | 1.83                                              | 0.15                                                                    | 27.9                                                  | 51.1                                                | 4.3                                                                                 | [62] |
| NIES-144    | 3 L fermentor with stepwise increase in irradiance in fed-batch and perfusion processes (mixotrophic) |                     |                                                   |                                                                         |                                                       |                                                     |                                                                                     | [90] |
|             | Batch                                                                                                 |                     |                                                   |                                                                         |                                                       |                                                     |                                                                                     |      |
|             | Fed-batch                                                                                             | 26 (6+20)           | 0.96                                              | 0.16                                                                    | 49                                                    | 213                                                 | 8.2                                                                                 |      |
|             | Perfusion                                                                                             | 30 (10+20)          | 2.8                                               | 0.28                                                                    |                                                       | 437                                                 | 15.1                                                                                |      |
|             |                                                                                                       | 38 (14+24)          | 4.48                                              | 0.32                                                                    |                                                       | 602                                                 | 15.8                                                                                |      |
| SKLBE ZY-18 | Sequential Heterotrophy-Dilution-Photoinduction (SHDP)                                                | 27 (17 + 10)        | 26                                                | 1.54                                                                    | 46                                                    | 64                                                  | 6.4                                                                                 | [91] |

\*The publication by Del Río et al. [42] reported the highest astaxanthin productivity (mg L<sup>-1</sup>d<sup>-1</sup>) to date using the one-stage continuous production process

\*\*FW = Fresh weight

**Table S3** Chemical composition of autotrophic and mixotrophic media used in the initial medium preference study for the green stage

| Medium component                                                         | 3N-BBM+V | 3N-BBM+V+ SA | BG-11 | EG:JM |
|--------------------------------------------------------------------------|----------|--------------|-------|-------|
| NaNO <sub>3</sub> (mgL <sup>-1</sup> )                                   | 750      | 750          | 1500  | 40    |
| Na <sub>2</sub> HPO <sub>4</sub> (mgL <sup>-1</sup> )                    |          |              |       |       |
| K <sub>2</sub> HPO <sub>4</sub> (mgL <sup>-1</sup> )                     | 75       | 75           | 40    |       |
| KH <sub>2</sub> PO <sub>4</sub> (mgL <sup>-1</sup> )                     | 175      | 175          |       | 6.2   |
| Na <sub>2</sub> HPO <sub>4</sub> 12H <sub>2</sub> O (mgL <sup>-1</sup> ) |          |              |       | 18    |
| MgSO <sub>4</sub> 7H <sub>2</sub> O (mgL <sup>-1</sup> )                 | 75       | 75           | 75    | 25    |
| C <sub>6</sub> H <sub>5</sub> O <sub>7</sub> (mgL <sup>-1</sup> )        |          |              | 6     |       |
| Ammonium ferric citrate green (mgL <sup>-1</sup> )                       |          |              | 6     |       |
| Ca(NO <sub>3</sub> ) <sub>2</sub> 4H <sub>2</sub> O (mgL <sup>-1</sup> ) |          |              |       | 10    |
| CaCl <sub>2</sub> 2H <sub>2</sub> O (mgL <sup>-1</sup> )                 | 25       | 25           | 36    |       |
| CaCl <sub>2</sub> (mgL <sup>-1</sup> )                                   |          |              |       | 5     |

|                                                                                                        |       |       |      |       |
|--------------------------------------------------------------------------------------------------------|-------|-------|------|-------|
| FeCl <sub>2</sub> 6H <sub>2</sub> O (mgL <sup>-1</sup> )                                               | 0.582 | 0.582 |      |       |
| CoCl <sub>2</sub> 6H <sub>2</sub> O (mgL <sup>-1</sup> )                                               | 0.012 | 0.012 |      |       |
| ZnCl <sub>2</sub> (mgL <sup>-1</sup> )                                                                 | 0.03  | 0.03  |      |       |
| Co(NO <sub>3</sub> ) <sub>2</sub> 6H <sub>2</sub> O (mgL <sup>-1</sup> )                               |       |       | 0.05 |       |
| CuSO <sub>4</sub> 5H <sub>2</sub> O (mgL <sup>-1</sup> )                                               |       |       | 0.08 |       |
| Cr <sub>2</sub> O <sub>3</sub> (mgL <sup>-1</sup> )                                                    |       |       |      |       |
| MnCl <sub>2</sub> 4H <sub>2</sub> O (mgL <sup>-1</sup> )                                               | 0.246 | 0.246 | 1.81 | 0.695 |
| Na <sub>2</sub> MoO <sub>4</sub> (mgL <sup>-1</sup> )                                                  |       |       |      |       |
| Na <sub>2</sub> MoO <sub>4</sub> 2H <sub>2</sub> O (mgL <sup>-1</sup> )                                | 0.024 | 0.024 | 0.39 |       |
| (NH <sub>4</sub> ) <sub>6</sub> Mo <sub>7</sub> O <sub>24</sub> 4H <sub>2</sub> O (mgL <sup>-1</sup> ) |       |       |      | 0.5   |
| H <sub>3</sub> BO <sub>3</sub> (mgL <sup>-1</sup> )                                                    |       |       | 2.86 | 1.24  |
| ZnSO <sub>4</sub> 7H <sub>2</sub> O (mgL <sup>-1</sup> )                                               |       |       | 0.22 |       |
| Na <sub>2</sub> CO <sub>3</sub> (mgL <sup>-1</sup> )                                                   |       |       | 20   |       |
| Na <sub>2</sub> -EDTA (mgL <sup>-1</sup> )                                                             |       |       | 1    | 1.125 |
| FeNa-EDTA (mgL <sup>-1</sup> )                                                                         |       |       |      | 1.125 |
| C <sub>2</sub> H <sub>3</sub> NaO <sub>2</sub> (mgL <sup>-1</sup> )                                    |       | 820   |      | 240   |
| Lab-Lemco powder (mgL <sup>-1</sup> )                                                                  |       |       |      | 500   |
| Tryptone (mgL <sup>-1</sup> )                                                                          |       |       |      | 1000  |
| Yeast extract (mgL <sup>-1</sup> )                                                                     |       |       |      | 1000  |
| NaCl (mgL <sup>-1</sup> )                                                                              | 25    | 25    |      |       |
| NaHCO <sub>3</sub> (mgL <sup>-1</sup> )                                                                |       |       |      | 7.95  |
| Thiamine-HCl (mgL <sup>-1</sup> )                                                                      | 0.012 | 0.012 |      | 0.02  |
| B <sub>12</sub> (mgL <sup>-1</sup> )                                                                   | 0.01  | 0.01  |      | 0.02  |

**Table S4** Composition of FM:FB. Nutrient concentrations (guaranteed minimum concentrations) in mg L<sup>-1</sup> calculated from information from GHE, France

| Constituent                                | mgL <sup>-1</sup> |
|--------------------------------------------|-------------------|
| Nitrogen as ammonium                       | 10                |
| Nitrogen as nitrate                        | 40                |
| Phosphate (P <sub>2</sub> O <sub>5</sub> ) | 250               |
| Potassium (K <sub>2</sub> O)               | 200               |
| Magnesium                                  | 250               |
| Sulphur                                    | 50                |
| Boron                                      | 0.1               |
| Calcium                                    | 70                |
| Copper                                     | 0.1               |
| Iron                                       | 1.2               |
| Manganese                                  | 0.4               |
| Molybdenum                                 | 0.04              |
| Zinc                                       | 0.15              |

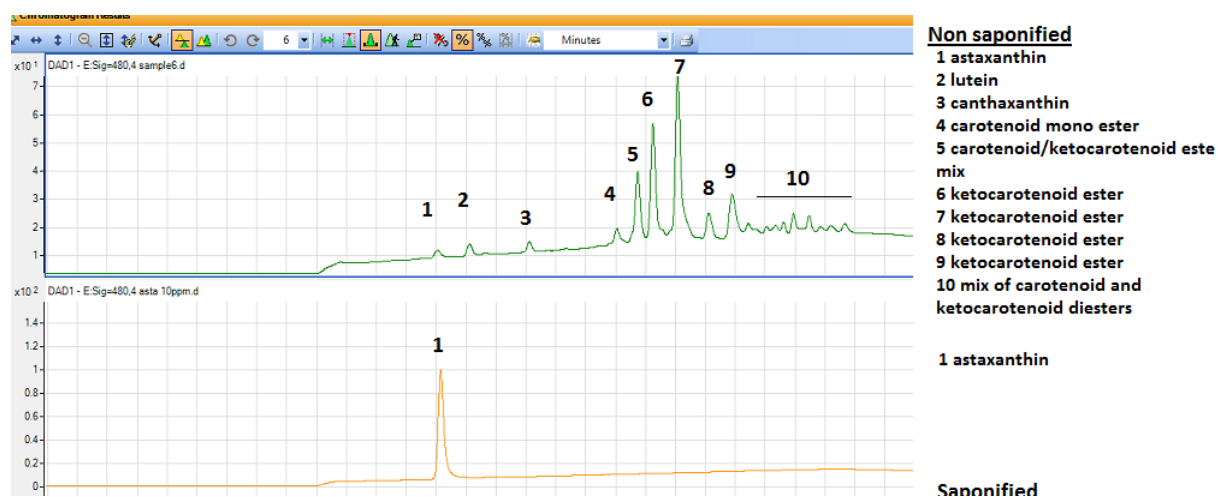

**Figure S1** Identification of carotenoid peaks by Liquid Chromatography-Mass Spectrometry (LC-MS)

**Table S5** Liquid Chromatography Mass Spectrometry (LC-MS) data

| Peak No | <i>m/z</i> [M+H]           | Putative Identity                          |
|---------|----------------------------|--------------------------------------------|
| 1       | 619                        | Astaxanthin <sup>a</sup>                   |
| 2       | 591                        | Lutein <sup>a</sup>                        |
| 3       | <b>565, 588 (+Na)</b>      | Canthaxanthin <sup>a</sup>                 |
| 4       | 864.7                      | Unknown Astaxanthin monoester <sup>b</sup> |
| 5       | 864.7                      | Unknown Astaxanthin monoester <sup>b</sup> |
| 6       | 859.6                      | Astaxanthin monoester (18:2)               |
| 6a      | 866.7                      | + 2 amu >than peaks 4 & 5                  |
| 7       | <b>861.6, 883.6 (+Na)</b>  | Astaxanthin monoester 18:1                 |
| 8       | 898.9                      | Unknown Astaxanthin ester                  |
| 9       | 868.7                      | Unknown Astaxanthin ester                  |
| 10      | 870.7, 872.7, 874.8, 876.8 | Mix of esterified forms                    |

Values in bold are major signals.

a – identity confirmed by standards

b – possibly astaxanthin monoester (14:0 + NH<sub>3</sub>) using data from Murphy et al. [92]

Most IDs are from Holtin et al. [49] and Frassanito et al. [93]

The main peaks 6 & 7 actually match with the relative abundance shown in this paper. The more hydrophobic peaks after peak 9 are probably diesters which do not yield detectable M+H ions, possibly due to multiply charged forms.

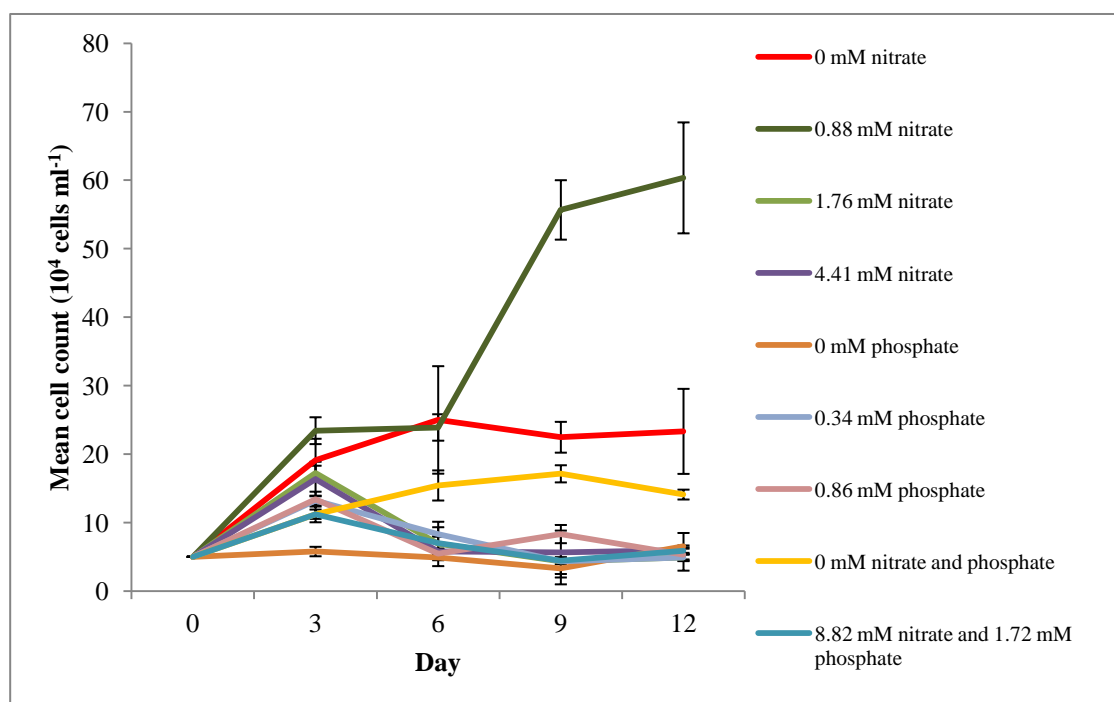**Figure S2** Effect of nitrate and phosphate concentration on growth in *H. pluvialis* (n = 3)

## References

2. Aflalo, C.; Meshulam, Y.; Zarka, A.; Boussiba, S. On the relative efficiency of two- vs. one-stage production of astaxanthin by the green alga *Haematococcus pluvialis*. *Biotechnology and Bioengineering*, **2007**, *98*, 300-305.
22. Olaizola, M.; Huntley, M.E. Recent advances in commercial production of astaxanthin from microalgae, in Fingerman, M.; Nagabhushanam, R. (eds.), *Recent Advances in Marine Biotechnology. Volume 9. Biomaterials and Bioprocessing*. New Hampshire: Science Publishers, **2003**, 143-164.
27. Burczyk, J. Cell wall carotenoids in green algae which form sporopollenins. *Phytochemistry*, **1987**, *26*, 121-128.
42. Del Río, E.; Ación F.G.; García-Malea, M.C.; Rivas, J.; Molina-Grima, E.; Guerrero, M.G. Efficient one-step production of astaxanthin by the microalga *Haematococcus pluvialis* in continuous culture. *Biotechnology and Bioengineering*, **2005**, *91*, 808-815.
43. Torzillo, G.; Goksan, T.; Faraloni C.; Kopecky, J.; Masojidek, J. Interplay between photochemical activities and pigment composition in an outdoor culture of *Haematococcus pluvialis* during the shift from the green to red stage. *Journal of Applied Phycology*, **2003**, *15*, 127-136.
49. Holtin, K.; Kuehnle, M.; Rehbein, J.; Schuler, P.; Nicholson, G. Albert, K. Determination of astaxanthin and astaxanthin esters in the microalgae *Haematococcus pluvialis* by LC-(APCI) MS and characterization of predominant carotenoid isomers by NMR spectroscopy. *Analytical and Bioanalytical chemistry*, **2009**, *395* (6), p.1613.
56. Sarada, R.; Bhattacharya, S.; Ravishankar, G. Optimization of culture conditions for growth of the green alga *Haematococcus pluvialis*. *World Journal of Microbiology and Biotechnology*, **2002**, *18*, 517-521.
58. Dalay, M.C.; Imamoglu, E.; Demirel, Z. Agricultural fertilizers as economical alternative for cultivation of *Haematococcus pluvialis*. *Journal of Microbiology and Biotechnology*, **2007**, *17*, 393-397.
62. Oncel, S.S.; Imamoglu, E.; Gunerken, E.; Sukan, F.V. Comparison of different cultivation modes and light intensities using mono-cultures and co-cultures of *Haematococcus pluvialis* and *Chlorella zofingiensis*. *Journal of Chemical Technology and Biotechnology*, **2011**, *86* (3), 414-420.
77. Orosa, M.; Valero, J.F.; Herrero, C.; Abalde, J. Comparison of the accumulation of astaxanthin in *Haematococcus pluvialis* and other green microalgae under N-starvation and high light conditions. *Biotechnology Letters*, **2001**, *23* (13), 1079-1085.
78. Zhang, D.H.; Lee, Y.K. Ketocarotenoid production by a mutant of *Chlorococcum* sp. in an outdoor tubular photobioreactor. *Biotechnology Letters*, **1999**, *21*(1), 7-10.
79. Renstrøm, B.; Berger, H.; Liaaen-Jensen, S. Esterified, optical pure (3S, 3' S)-astaxanthin from flowers of *Adonis annua*. *Biochemical Systematics and Ecology*, **1981**, *9* (4), 249-250.
80. Banerjee, K.; Ghosh, R.; Homechaudhuri, S.; Mitra, A. Biochemical composition of marine macroalgae from Gangetic Delta at the apex of Bay of Bengal. *African Journal of Basic & Applied Sciences*, **2009**, *1* (5-6), 96-104.
81. Yokoyama, A.; Adachi, K.; Shizuri, Y. New carotenoid glucosides, astaxanthin glucoside and adonixanthin glucoside, isolated from the astaxanthin-producing marine bacterium, *Agrobacterium aurantiacum*. *Journal of natural products*, **1995**, *58* (12), 1929-1933.
82. Bories, G.; Brantom, P.; de Barberà, J.B.; Chesson, A.; Cocconcelli, P.S.; Debski, B.; Dierick, N.; Franklin, A.; Gropp, J.; Halle, I.; Hogstrand, C. Safety and efficacy of Panaferd-AX (red carotenoid-rich bacterium (*Paracoccus carotinifaciens*) as feed additive for salmon and trout. *EFSA J.*, **2007**, *546*, 1-30.
83. Gassel, S.; Schewe, H.; Schmidt, I.; Schrader, J.; Sandmann, G. Multiple improvement of astaxanthin biosynthesis in *Xanthophyllomyces dendrorhous* by a combination of conventional mutagenesis and metabolic pathway engineering. *Biotechnology Letters*, **2013**, *35* (4), 565-569.
84. Zhang, X.W., Gong, X.D. and Chen, F. Kinetic models for astaxanthin production by high cell density mixotrophic culture of the microalga *Haematococcus pluvialis*. *Journal of Industrial Microbiology and Biotechnology*, **1999**, *23* (1), pp.691-696.
85. Hata, N.; Ogonna, J.C.; Hasegawa, Y.; Taroda, H.; Tanaka, H. Production of astaxanthin by *Haematococcus pluvialis* in a sequential heterotrophic-photoautotrophic culture. *Journal of Applied Phycology*, **2001**, *13* (5), 395-402.
86. Kang, C.D.; Lee, J.S.; Park, T.H.; Sim, S.J.; 2005. Comparison of heterotrophic and photoautotrophic induction on astaxanthin production by *Haematococcus pluvialis*. *Applied Microbiology and Biotechnology*, **2005**, *68* (2), 237-241.
87. López, M.G.M.; Sánchez, E.D.R.; López, J.C.; Fernández, F.A.; Sevilla, J.F.; Rivas, J.; Guerrero, M.G.; Grima, E.M. Comparative analysis of the outdoor culture of *Haematococcus pluvialis* in tubular and bubble column photobioreactors. *Journal of Biotechnology*, **2006**, *123* (3), 329-342.



88. Ranjbar, R.; Inoue, R.; Shiraishi, H.; Katsuda, T.; Katoh, S. High efficiency production of astaxanthin by autotrophic cultivation of *Haematococcus pluvialis* in a bubble column photobioreactor. *Biochemical Engineering Journal*, **2008**, 39 (3), 575-580.
89. Kang, C.D.; Han, S.J.; Choi, S.P.; Sim, S.J. Fed-batch culture of astaxanthin-rich *Haematococcus pluvialis* by exponential nutrient feeding and stepwise light supplementation. *Bioprocess and Biosystems Engineering*, **2010**, 33 (1), 133.
90. Park, J.C.; Choi, S.P.; Hong, M.E.; Sim, S.J. Enhanced astaxanthin production from microalga, *Haematococcus pluvialis* by two-stage perfusion culture with stepwise light irradiation. *Bioprocess and Biosystems Engineering*, **2014**, 37 (10), 2039-2047.
91. Wan, M.; Zhang, Z.; Wang, J.; Huang, J.; Fan, J.; Yu, A.; Wang, W.; Li, Y. Sequential Heterotrophy–Dilution–Photoinduction Cultivation of *Haematococcus pluvialis* for efficient production of astaxanthin. *Bioresource Technology*, **2015**, 198, 557-563.
92. Murphy, R.C.; James, P.F.; McAnoy, A.M.; Krank, J.; Duchoslav, E.; Barkley, R.M. Detection of the abundance of diacylglycerol and triacylglycerol molecular species in cells using neutral loss mass spectrometry. *Analytical biochemistry*, **2007**, 366 (1), pp.59-70.
93. Frassanito, R., Cantonati, M., Flaim, G., Mancini, I. and Guella, G. A new method for the identification and the structural characterisation of carotenoid esters in freshwater microorganisms by liquid chromatography/electrospray ionisation tandem mass spectrometry. *Rapid Communications in Mass Spectrometry*, **2008**, 22 (22), pp.3531-3539.
